# Supplementary material for: Multiple origins and the population genetic structure of Rubus takesimensis (Rosaceae) on Ulleung Island: Implications for the genetic consequences of anagenetic speciation
Source: PLoS One. 2019 Sep 19;14(9):e0222707. doi: 10.1371/journal.pone.0222707 (PMC6752786; doi:10.1371/journal.pone.0222707)
Supplement: S3 Table — Variable sites found in Rubus crataegifolius identifying 81 haplotypes. (XLSX) [file pone.0222707.s003.xlsx]

## Sheet: Sheet1
S3 Table. Variable sites found in Rubus crataegifolius identifying 81 haplotypes.
	61-65	66	72-75	76	77-79	80	81-86	87	110-128	280-296	334-352	353-381	409-435	441	501	503	506	507	512-529	543	544	820	957	1003	1008	1027	1056	1057	1058	1059	1068	1069	1197	1212-1222	1360	1422	1433	1626	1641	1685	1686	1696	1697	1699	1739-1759	1784-1796	1797-1846	1857	1877
H40	˗	A	AATT	T	AAT	A	AAAAAT	T	˗	˗	˗	˗	˗	C	T	A	T	A	˗	C	T	A	T	G	G	C	T	˗	˗	˗	C	T	A	AAGCTAAAAAA	C	C	T	C	T	A	˗	A	A	A	˗	AATAATATATATT	˗	A	T
H41	˗	A	AATT	T	AAT	A	AAAAAT	T	˗	˗	˗	˗	˗	C	T	A	T	A	˗	C	T	A	T	G	G	C	T	˗	˗	˗	C	T	A	AAGCTAAAAAA	C	C	T	C	T	A	˗	A	A	A	˗	AATAATATATATT	˗	A	T
H42	˗	A	AATT	T	AAT	A	AAAAAT	T	˗	˗	˗	˗	˗	C	T	A	T	A	TTATATATGAATTATATC	C	T	A	G	G	G	C	T	˗	˗	˗	C	T	A	AAGCTAAAAAA	C	C	T	C	T	A	˗	A	A	A	˗	AATAATATATATT	˗	A	T
H44	˗	A	AATT	T	AAT	A	AAAAAT	T	˗	˗	˗	˗	˗	C	T	T	T	A	˗	C	T	A	G	G	G	C	T	˗	˗	C	C	T	A	AAGCTAAAAAA	C	C	T	C	T	A	˗	A	A	A	˗	AATAATATATATT	˗	A	T
H45	˗	A	AATT	T	AAT	A	AAAAAT	T	˗	˗	˗	˗	˗	C	T	T	T	A	˗	C	T	A	G	G	G	C	T	˗	˗	C	C	T	A	AAGCTAAAAAA	C	C	T	C	T	A	˗	A	A	A	˗	AATAATATATATT	˗	A	T
H46	˗	A	AATT	T	AAT	A	AAAAAT	T	˗	˗	˗	˗	˗	C	T	A	T	A	˗	C	T	A	G	T	G	C	T	˗	˗	C	C	T	A	AAGCTAAAAAA	C	C	T	C	T	A	˗	A	A	A	˗	AATAATATATATT	˗	A	T
H47	˗	A	AATT	T	AAT	A	AAAAAT	T	˗	˗	˗	˗	˗	C	T	A	T	A	˗	C	T	A	G	G	G	C	T	˗	C	C	C	T	A	AAGCTAAAAAA	C	C	T	C	T	A	˗	A	A	A	˗	AATAATATATATT	˗	A	T
H48	˗	A	AATT	T	AAT	A	AAAAAT	T	˗	˗	˗	˗	˗	C	T	A	T	A	˗	C	T	A	G	G	G	C	T	˗	˗	˗	C	T	A	AAGCTAAAAAA	C	C	T	C	T	A	˗	A	A	A	˗	AATAATATATATT	˗	A	T
H49	˗	A	AATT	T	AAT	A	AAAAAT	T	˗	˗	˗	˗	˗	C	T	A	T	A	TTATATATGAATTATATC	C	T	A	G	G	G	C	T	˗	˗	˗	C	T	A	AAGCTAAAAAA	C	C	T	C	T	A	˗	A	A	A	˗	AATAATATATATT	˗	A	T
H50	˗	A	AATT	T	AAT	A	AAAAAT	T	˗	˗	˗	˗	˗	C	T	A	T	A	˗	C	T	A	G	G	G	C	T	˗	˗	˗	C	T	A	AAGCTAAAAAA	C	C	T	C	T	A	˗	A	A	A	˗	AATAATATATATT	˗	A	T
H51	˗	A	AATT	T	AAT	A	AAAAAT	T	˗	˗	˗	˗	˗	C	T	A	T	A	˗	C	T	A	G	G	G	C	T	˗	˗	C	C	T	A	AAGCTAAAAAA	C	C	T	C	T	A	˗	A	A	A	˗	AATAATATATATT	˗	A	T
H52	˗	A	AATT	T	AAT	A	AAAAAT	T	˗	˗	˗	˗	˗	C	T	A	T	A	˗	C	T	A	G	G	G	C	T	˗	˗	˗	C	T	A	AAGCTAAAAAA	C	C	T	C	T	A	˗	A	A	A	˗	AATAATATATATT	˗	A	T
H53	˗	A	AATT	T	AAT	A	AAAAAT	T	˗	˗	˗	˗	˗	C	T	A	T	A	TTATATATGAATTATATC	C	T	A	G	G	G	C	T	˗	˗	˗	C	T	A	AAGCTAAAAAA	C	C	T	C	T	A	˗	A	A	A	˗	AATAATATATATT	˗	A	T
H54	˗	A	AATT	T	AAT	A	AAAAAT	T	˗	˗	˗	˗	˗	C	T	A	T	A	˗	C	T	A	G	G	G	C	T	˗	˗	˗	C	T	A	AAGCTAAAAAA	C	T	T	C	T	A	˗	A	A	A	TAATATAATATATTGTATTG	AATAATATATATT	˗	A	G
H55	˗	A	AATT	T	AAT	A	AAAAAT	A	˗	˗	˗	˗	˗	C	T	A	T	A	˗	C	T	A	G	G	G	C	T	˗	˗	˗	C	T	A	AAGCTAAAAAA	C	C	T	C	T	A	˗	A	A	A	˗	AATAATATATATT	˗	A	T
H56	ATTAA	A	AATT	T	AAT	A	AAAAAT	A	˗	˗	ATACTTATATATAAAACAT	˗	˗	A	T	A	T	A	˗	C	T	A	G	T	G	C	T	˗	˗	˗	C	T	A	AAGCTAAAAAA	C	C	T	C	T	A	˗	A	A	A	˗	AATAATATATATT	˗	A	T
H57	˗	T	AATT	T	AAT	A	AAAAAT	A	˗	˗	˗	˗	˗	A	T	A	T	A	˗	C	T	A	G	T	G	C	T	˗	˗	˗	C	T	A	AAGCTAAAAAA	C	C	T	C	T	A	˗	A	A	A	˗	AATAATATATATT	˗	A	T
H59	˗	A	AATT	T	AAT	A	AAAAAT	A	˗	˗	˗	˗	˗	A	T	A	T	A	˗	C	T	A	G	T	G	C	T	˗	˗	˗	C	T	A	AAGCTAAAAAA	C	C	T	C	T	A	T	A	A	A	˗	AATAATATATATT	˗	A	T
H60	˗	A	AATT	T	AAT	A	AAAAAT	A	˗	˗	˗	˗	˗	A	T	A	T	A	˗	C	T	A	G	T	G	C	T	˗	˗	˗	C	T	A	AAGCTAAAAAA	C	C	T	C	T	A	T	A	A	A	˗	AATAATATATATT	˗	A	T
H61	˗	A	AATT	T	AAT	A	AAAAAT	A	˗	˗	˗	˗	˗	A	T	A	T	A	˗	C	T	A	G	T	G	C	T	˗	˗	˗	C	T	A	AAGCTAAAAAA	C	C	T	C	T	A	T	A	A	A	˗	AATAATATATATT	˗	A	T
H62	˗	A	AATT	T	AAT	A	AAAAAT	A	˗	˗	˗	˗	˗	A	T	A	T	A	˗	C	T	A	G	T	G	C	T	˗	˗	˗	C	T	A	AAGCTAAAAAA	C	C	T	C	T	A	T	A	A	A	˗	AATAATATATATT	˗	A	T
H63	˗	A	AATT	T	AAT	A	AAAAAT	T	˗	˗	˗	˗	˗	C	T	A	T	A	˗	C	T	A	G	G	G	C	T	˗	˗	˗	C	T	A	AAGCTAAAAAA	C	C	T	C	T	A	˗	A	A	A	˗	AATAATATATATT	˗	A	T
H64	˗	A	AATT	T	AAT	A	AAAAAT	T	˗	˗	˗	˗	˗	C	T	A	T	A	˗	C	T	A	G	G	G	C	T	˗	˗	˗	C	T	A	AAGCTAAAAAA	C	C	T	C	T	A	˗	A	A	A	˗	AATAATATATATT	˗	A	T
H65	˗	A	AATT	T	AAT	A	AAAAAT	T	˗	˗	˗	˗	˗	C	T	A	T	A	˗	C	T	A	G	G	G	C	T	˗	˗	˗	C	T	A	AAGCTAAAAAA	C	C	T	C	T	A	˗	A	A	A	˗	AATAATATATATT	˗	A	T
H66	˗	A	AATT	T	AAT	A	AAAAAT	T	˗	˗	˗	˗	˗	C	T	A	T	A	˗	C	T	A	G	G	G	C	T	˗	˗	˗	C	T	A	AAGCTAAAAAA	C	C	T	C	T	A	˗	A	A	A	˗	AATAATATATATT	˗	A	T
H67	˗	A	AATT	T	AAT	A	AAAAAT	T	˗	˗	˗	˗	˗	C	T	A	T	A	˗	C	T	A	G	G	G	C	T	˗	˗	˗	C	T	A	AAGCTAAAAAA	A	C	T	C	T	A	˗	A	A	A	˗	AATAATATATATT	˗	A	T
H68	˗	A	AATT	T	AAT	A	AAAAAT	A	˗	˗	˗	˗	˗	C	T	A	T	A	˗	C	T	A	G	G	G	C	T	˗	˗	˗	C	T	A	AAGCTAAAAAA	C	T	G	C	T	A	˗	A	A	A	˗	AATAATATATATT	˗	T	T
H69	˗	A	AATT	T	AAT	A	AAAAAT	T	˗	˗	˗	˗	˗	C	T	A	T	A	TTATATATGAATTATATC	C	T	A	G	G	G	C	T	˗	˗	˗	C	T	A	AAGCTAAAAAA	C	C	T	C	T	A	˗	A	A	A	˗	AATAATATATATT	˗	A	T
H70	˗	A	AATT	T	AAT	A	AAAAAT	T	˗	˗	˗	˗	˗	C	T	A	T	A	TTATATATGAATTATATC	C	T	A	G	G	G	C	T	˗	˗	C	C	T	A	AAGCTAAAAAA	C	C	T	C	T	A	˗	T	T	T	˗	AATAATATATATT	˗	A	T
H71	˗	A	AATT	T	AAT	A	AAAAAT	T	˗	˗	˗	˗	˗	C	T	A	T	A	˗	C	T	A	G	G	G	C	T	˗	˗	˗	C	T	A	AAGCTAAAAAA	C	C	T	C	T	A	T	T	T	T	˗	AATAATATATATT	˗	A	T
H72	˗	A	AATT	T	AAT	A	AAAAAT	T	˗	˗	˗	˗	˗	C	T	A	T	A	TTATATATGAATTATATC	C	T	A	G	G	G	C	T	˗	˗	C	C	T	A	AAGCTAAAAAA	C	C	T	C	T	A	˗	T	T	T	˗	AATAATATATATT	GTATTTAATTAAAAATTAAATATTTGGTATGGAATTAAATAATATATATG	A	T
H73	˗	A	AATT	T	AAT	A	AAAAAT	T	˗	˗	˗	˗	˗	C	T	A	T	A	˗	C	T	A	G	G	G	C	T	˗	˗	C	C	T	A	AAGCTAAAAAA	C	C	T	C	T	A	˗	T	T	T	˗	AATAATATATATT	˗	A	T
H74	˗	A	AATT	T	AAT	A	AAAAAT	T	˗	˗	˗	˗	˗	C	T	A	T	A	˗	C	T	A	G	G	G	C	T	˗	˗	C	C	T	A	AAGCTAAAAAA	C	C	T	C	T	A	˗	T	T	A	˗	AATAATATATATT	˗	A	T
H75	˗	A	AATT	T	AAT	A	AAAAAT	T	˗	˗	˗	˗	˗	C	T	A	T	A	˗	C	T	A	G	G	G	C	T	˗	˗	C	C	T	A	AAGCTAAAAAA	C	C	T	C	T	A	˗	T	T	T	˗	AATAATATATATT	˗	A	T
H76	˗	A	AATT	T	AAT	A	AAAAAT	T	˗	CATTTATTGAATTTTTG	˗	˗	˗	C	T	A	T	A	˗	C	T	A	G	G	G	C	T	˗	˗	˗	C	T	A	AAGCTAAAAAA	C	C	T	C	T	A	˗	A	A	A	˗	AATAATATATATT	˗	A	T
H77	˗	A	AATT	T	AAT	A	AAAAAT	T	˗	˗	˗	˗	˗	C	T	A	T	A	TTATATATGAATTATATC	C	T	A	G	G	A	C	T	˗	˗	˗	C	T	A	AAGCTAAAAAA	C	C	T	C	T	A	˗	A	A	A	˗	AATAATATATATT	˗	A	T
H78	˗	A	AATT	T	AAT	A	AAAAAT	T	˗	˗	˗	˗	˗	C	T	A	T	A	˗	C	T	A	G	G	G	C	T	˗	˗	˗	C	T	A	AAGCTAAAAAA	C	C	T	C	T	A	˗	A	A	A	˗	AATAATATATATT	˗	A	T
H79	˗	A	AATT	T	AAT	A	AAAAAT	T	˗	˗	˗	˗	˗	C	T	A	T	A	˗	C	T	A	G	G	G	C	T	˗	˗	˗	C	T	A	AAGCTAAAAAA	C	C	T	C	T	A	˗	A	A	A	˗	AATAATATATATT	˗	A	T
H80	˗	A	AATT	T	AAT	A	AAAAAT	T	˗	˗	˗	˗	˗	C	T	A	T	A	˗	C	T	A	G	G	G	C	T	˗	˗	˗	C	T	A	AAGCTAAAAAA	C	C	T	C	T	A	˗	A	A	A	˗	AATAATATATATT	˗	A	T
H81	˗	A	AATT	T	AAT	A	AAAAAT	T	˗	˗	˗	˗	˗	C	T	A	T	A	˗	C	T	A	G	G	G	C	T	˗	˗	˗	C	T	A	AAGCTAAAAAA	C	C	T	C	T	A	˗	A	A	A	˗	AATAATATATATT	˗	A	T
H82	˗	A	AATT	T	AAT	A	AAAAAT	T	˗	˗	˗	˗	˗	C	T	A	T	A	TTATATATGAATTATATC	A	T	A	G	G	G	C	T	˗	˗	˗	C	T	A	AAGCTAAAAAA	C	C	T	C	T	A	˗	A	A	A	˗	AATAATATATATT	˗	A	T
H83	˗	A	AATT	T	AAT	A	AAAAAT	T	˗	˗	˗	˗	˗	C	T	A	T	C	TTATATATGAATTATATC	C	T	A	G	G	G	C	T	˗	˗	˗	C	T	A	AAGCTAAAAAA	C	C	T	C	T	A	˗	A	A	A	˗	AATAATATATATT	˗	A	T
H84	˗	A	AATT	T	AAT	A	AAAAAT	T	˗	˗	˗	˗	˗	C	T	A	T	A	˗	C	T	A	G	G	G	C	T	˗	T	˗	C	C	A	AAGCTAAAAAA	C	C	T	C	T	A	˗	A	A	A	˗	AATAATATATATT	˗	A	T
H85	˗	A	AATT	T	AAT	A	AAAAAT	T	˗	˗	˗	˗	˗	C	T	A	T	A	TTATATATGAATTATATC	C	T	A	G	G	G	C	T	˗	C	˗	C	T	A	AAGCTAAAAAA	C	C	T	C	T	A	˗	A	A	A	˗	AATAATATATATT	˗	A	T
H86	˗	A	AATT	T	AAT	A	AAAAAT	T	˗	˗	˗	˗	˗	C	T	A	T	A	˗	C	T	A	G	G	G	C	C	˗	˗	˗	C	T	A	AAGCTAAAAAA	C	C	T	C	T	A	˗	A	A	A	˗	AATAATATATATT	˗	A	T
H87	˗	A	AATT	T	AAT	A	AAAAAT	T	TTTTTGAAATGAAAATTC	˗	ATACTTATATATAAAACAT	ATACTTATATATTCCTTATTTAAGTAAAA	˗	C	T	A	T	A	TTATATATGAATTATATC	C	T	A	G	G	G	C	T	˗	˗	˗	C	C	A	AAGCTAAAAAA	C	C	T	C	T	A	˗	A	A	A	˗	AATAATATATATT	˗	A	T
H88	˗	A	AATT	T	AAT	A	AAAAAT	T	˗	˗	˗	˗	˗	C	T	A	T	A	TTATATATGAATTATATC	C	T	A	G	G	G	C	T	˗	˗	˗	C	T	C	AAGCTAAAAAA	C	C	T	C	T	A	˗	A	A	A	˗	AATAATATATATT	˗	A	T
H89	˗	A	AATT	T	AAT	A	AAAAAT	T	˗	˗	˗	˗	˗	C	G	A	T	A	TTATATATGAATTATATC	C	T	A	G	G	G	C	T	˗	˗	C	C	T	A	AAGCTAAAAAA	C	C	T	C	T	A	˗	A	A	A	˗	AATAATATATATT	˗	A	T
H90	˗	A	AATT	T	AAT	C	AAAAAT	T	˗	˗	˗	˗	˗	C	T	A	T	A	TTATATATGAATTATATC	C	T	A	G	G	G	C	T	˗	˗	˗	C	T	A	AAGCTAAAAAA	C	C	T	C	T	A	˗	A	A	A	˗	AATAATATATATT	˗	A	T
H91	˗	A	AATT	T	AAT	A	AAAAAT	T	˗	˗	˗	˗	˗	C	T	A	T	A	˗	C	T	C	G	G	G	C	T	˗	C	C	C	T	A	AAGCTAAAAAA	C	C	T	C	G	A	˗	A	A	A	˗	AATAATATATATT	˗	A	T
H92	˗	A	AATT	T	AAT	A	AAAAAT	T	˗	˗	˗	˗	˗	C	T	A	T	A	˗	C	T	C	G	G	G	C	T	˗	˗	C	C	T	A	AAGCTAAAAAA	C	C	T	T	G	A	˗	A	A	A	˗	AATAATATATATT	˗	A	T
H93	˗	A	AATT	T	AAT	A	AAAAAT	T	˗	˗	˗	˗	˗	C	T	A	T	A	˗	C	T	C	G	G	G	C	T	˗	˗	C	C	T	A	AAGCTAAAAAA	C	C	T	C	G	A	˗	A	A	A	˗	AATAATATATATT	˗	A	T
H94	˗	A	AATT	T	AAT	A	AAAAAT	T	˗	˗	˗	˗	˗	C	T	A	T	A	˗	C	T	C	G	G	G	C	T	˗	˗	C	C	T	A	AAGCTAAAAAA	C	C	T	C	G	A	˗	T	T	T	˗	AATAATATATATT	˗	A	T
H95	˗	A	AATT	T	AAT	A	AAAAAT	T	˗	˗	˗	˗	˗	C	T	A	A	A	˗	C	T	C	G	G	G	C	T	˗	C	C	C	T	A	AAGCTAAAAAA	C	C	T	C	G	A	˗	A	A	A	˗	AATAATATATATT	˗	A	T
H96	˗	A	AATT	T	AAT	A	AAAAAT	T	˗	˗	˗	˗	˗	C	T	A	A	A	˗	C	G	C	G	G	G	C	T	˗	˗	˗	C	T	A	AAGCTAAAAAA	C	C	T	C	G	A	˗	A	A	A	˗	AATAATATATATT	˗	A	T
H97	˗	A	AATT	T	AAT	A	AAAAAT	T	˗	˗	˗	˗	˗	C	T	A	A	A	˗	C	G	C	G	G	G	C	T	˗	˗	˗	C	T	A	AAGCTAAAAAA	C	C	T	C	G	A	˗	A	A	A	˗	AATAATATATATT	˗	A	T
H98	˗	A	AATT	T	AAT	A	AAAAAT	T	˗	˗	˗	˗	˗	C	T	A	A	A	˗	C	G	C	G	G	G	C	T	˗	˗	˗	C	T	A	AAGCTAAAAAA	C	C	T	C	G	A	˗	A	A	A	˗	AATAATATATATT	˗	A	T
H99	˗	A	AATT	A	AAT	A	AAAAAT	T	˗	˗	˗	˗	˗	C	T	A	A	A	˗	C	G	C	G	G	G	C	T	˗	C	C	C	T	A	AAGCTAAAAAA	C	C	T	C	G	A	˗	A	A	A	˗	AATAATATATATT	˗	A	T
H104	˗	A	AATT	T	AAT	A	AAAAAT	T	˗	˗	˗	˗	ATCTTAT-ATTAAAACATATACTTAT-	C	T	A	A	A	TTATATATGAATTATATC	A	T	A	G	G	G	C	T	˗	˗	C	T	T	A	AAGCTAAAAAA	C	C	T	C	T	A	˗	T	A	A	˗	AATAATATATATT	˗	A	T
H105	˗	A	AATT	T	AAT	A	AAAAAT	T	˗	˗	˗	˗	ATCTTAT-ATTAAAACATATACTTAT-	C	T	A	T	A	TTATATATGAATTATATC	A	T	A	G	G	G	A	T	˗	˗	C	T	T	A	AAGCTAAAAAA	C	C	T	C	T	C	˗	T	A	A	˗	AATAATATATATT	˗	A	T
H106	˗	A	AATT	T	AAT	A	AAAAAT	T	˗	˗	˗	˗	ATCTTAT-ATTAAAACATATACTTAT-	C	T	A	T	A	TTATATATGAATTATATC	A	T	A	G	G	G	A	T	˗	˗	C	T	T	A	AAGCTAAAAAA	C	C	T	C	T	C	˗	T	A	A	˗	AATAATATATATT	˗	A	T
H107	˗	A	AATT	T	AAT	A	AAAAAT	T	˗	˗	˗	˗	ATCTTAT-ATTAAAACATATACTTAT-	C	T	A	T	A	TTATATATGAATTATATC	A	T	A	G	G	G	A	T	˗	C	C	T	T	A	AAGCTAAAAAA	C	C	T	C	T	C	˗	T	A	A	˗	AATAATATATATT	˗	A	T
H110	˗	A	AATT	T	AAT	A	AAAAAT	T	˗	˗	˗	˗	ATCTTAT-ATTAAAACATATACTTAT-	C	T	A	T	A	TTATATATGAATTATATC	A	T	A	G	G	G	A	T	˗	˗	˗	T	T	A	AAGCTAAAAAA	C	C	T	C	T	C	˗	T	A	A	˗	AATAATATATATT	˗	A	T
H111	˗	A	AATT	T	AAT	A	AAAAAT	T	˗	˗	˗	˗	ATCTTAT-ATTAAAACATATACTTAT-	C	T	A	T	A	TTATATATGAATTATATC	A	T	A	G	G	G	A	T	˗	˗	˗	T	T	A	AAGCTAAAAAA	C	C	T	C	T	C	˗	T	A	A	˗	AATAATATATATT	˗	A	T
H112	˗	A	˗	˗	˗	˗	˗	˗	˗	˗	˗	˗	˗	C	T	A	T	A	TTATATATGAATTATATC	A	T	A	G	G	G	A	T	˗	C	C	T	T	A	˗	C	C	T	C	T	C	˗	T	A	A	˗	AATAATATATATT	˗	A	T
H113	˗	A	˗	˗	˗	˗	˗	˗	˗	˗	˗	˗	˗	C	T	A	T	A	TTATATATGAATTATATC	A	T	A	G	G	G	A	T	˗	˗	C	T	T	A	˗	C	C	T	C	T	C	˗	T	A	A	˗	AATAATATATATT	˗	A	T
H114	˗	A	AATT	T	AAT	A	AAAAAT	T	˗	˗	˗	˗	ATCTTAT-ATTAAAACATATACTTAT-	C	T	A	T	A	TTATATATGAATTATATC	A	T	A	G	G	G	A	T	˗	˗	C	T	T	A	AAGCTAAAAAA	C	C	T	C	T	C	˗	T	A	A	˗	AATAATATATATT	˗	A	T
H115	˗	A	AATT	T	AAT	A	AAAAAT	T	˗	˗	˗	˗	ATCTTATAATTAAAACATATACTTATA	C	T	A	T	A	TTATATATGAATTATATC	A	T	A	G	G	G	A	T	˗	˗	C	C	T	A	AAGCTAAAAAA	C	C	T	C	T	C	˗	T	A	A	˗	AATAATATATATT	˗	A	T
H116	˗	A	AATT	T	AAT	A	AAAAAT	T	˗	˗	˗	˗	ATCTTAT-ATTAAAACATATACTTAT-	C	T	A	T	A	TTATATATGAATTATATC	A	T	A	G	G	G	A	T	˗	˗	C	T	T	A	AAGCTAAAAAA	C	C	T	C	T	C	T	T	A	A	˗	AATAATATATATT	˗	A	T
H117	˗	A	AATT	T	AAT	A	AAAAAT	T	˗	˗	˗	˗	ATCTTAT-ATTAAAACATATACTTAT-	C	T	A	T	A	TTATATATGAATTATATC	A	T	A	G	G	G	A	T	˗	˗	C	T	T	A	AAGCTAAAAAA	C	C	T	C	T	C	˗	T	A	A	˗	AATAATATATATT	˗	A	T
H118	˗	A	AATT	T	AAT	A	AAAAAT	T	˗	˗	˗	˗	ATCTTAT-ATTAAAACATATACTTAT-	C	T	A	T	A	TTATATATGAATTATATC	A	T	A	G	G	G	A	T	˗	˗	C	T	T	A	AAGCTAAAAAA	C	C	T	C	T	C	˗	T	A	A	˗	AATAATATATATT	˗	A	T
H120	˗	A	˗	˗	˗	˗	˗	˗	˗	˗	˗	˗	˗	C	T	A	T	A	TTATATATGAATTATATC	A	T	A	G	G	G	A	T	˗	˗	C	T	T	A	˗	C	C	T	C	T	A	T	T	A	A	˗	AATAATATATATT	˗	A	T
H121	˗	A	˗	˗	˗	˗	˗	˗	˗	˗	˗	˗	˗	C	T	A	T	A	TTATATATGAATTATATC	A	T	A	G	G	G	A	T	˗	˗	C	T	T	A	˗	C	C	T	C	T	A	T	T	A	A	˗	AATAATATATATT	˗	A	T
H122	˗	A	˗	˗	˗	˗	˗	˗	˗	˗	˗	˗	˗	C	T	A	T	A	TTATATATGAATTATATC	A	T	A	G	G	G	A	T	˗	˗	C	T	T	A	˗	C	C	T	C	T	A	T	T	A	A	˗	AATAATATATATT	˗	A	T
H123	˗	A	˗	˗	˗	˗	˗	˗	˗	˗	˗	˗	˗	C	T	A	T	A	TTATATATGAATTATATC	A	T	A	G	G	G	A	T	˗	˗	C	T	T	A	˗	C	C	T	C	T	A	T	T	A	A	˗	AATAATATATATT	˗	A	T
H124	˗	A	˗	˗	˗	˗	˗	˗	˗	˗	˗	˗	˗	C	T	A	T	A	TTATATATGAATTATATC	A	T	A	G	G	G	A	T	C	C	C	T	T	A	˗	C	C	T	C	T	A	˗	T	A	A	˗	AATAATATATATT	˗	A	T
H125	˗	A	˗	˗	˗	˗	˗	˗	˗	˗	˗	˗	˗	C	T	A	T	A	TTATATATGAATTATATC	A	T	A	G	G	G	A	T	C	C	C	T	T	A	˗	C	C	T	C	T	A	˗	T	A	A	˗	AATAATATATATT	˗	A	T
H126	˗	A	˗	˗	˗	˗	˗	˗	˗	˗	˗	˗	˗	C	T	A	T	A	TTATATATGAATTATATC	A	T	A	G	G	G	A	T	C	C	C	T	T	A	˗	C	C	T	C	T	A	˗	T	A	A	˗	AATAATATATATT	˗	A	T
H127	˗	A	AATT	T	AAT	A	AAAAAT	T	˗	˗	˗	˗	ATCTTAT-ATTAAAACATATACTTAT-	C	T	A	T	A	TTATATATGAATTATATC	A	T	A	G	G	G	A	T	˗	˗	C	T	T	A	AAGCTAAAAAA	C	C	T	C	T	A	˗	T	A	A	˗	AATAATATATATT	˗	A	T
H128	˗	A	˗	˗	˗	˗	˗	˗	˗	˗	˗	˗	˗	C	T	A	T	A	TTATATATGAATTATATC	A	T	A	G	G	G	A	T	C	C	C	T	T	A	˗	C	C	T	C	T	A	T	T	A	A	˗	AATAATATATATT	˗	A	T
H129	˗	A	AATT	T	AAT	A	AAAAAT	T	˗	˗	˗	˗	˗	C	T	A	T	A	TTATATATGAATTATATC	C	T	A	G	G	G	C	T	˗	˗	˗	C	T	A	AAGCTAAAAAA	C	C	T	C	T	A	˗	A	A	A	˗	˗	˗	˗	T
[truncated: 70 more columns]
